# Supplementary material
Source: publisher figshare collection journal article supplement (https://acs.figshare.com/ndownloader/files/26356610)
Supplement: Supplementary file 1 [file 26356610]

Compound	SMILES	IC50 (3D7, nM)	IC50 (Dd2, nM)	IC50 (HepG2, nM)	IC50 (293T, nM)	IC50 (GB4, nM)	IC50 (C2A, nM)	IC50 (CP286, nM)	IC50 (6320, nM)	IC50 (6218, nM)
1	O=C(NO)C1=CN=C(N=C1)N2CCC(CNCC3=CN(C4=C3C=CC=C4)C)CC2.[H]Cl	5.2 ¡À 1.6	7.09 ¡À 0.01	42 ¡À 10	48 ¡À 1	1.7 ¡À 0.1	2.53 ¡À 0.06	2.04 ¡À 0.05	1.62 ¡À 0.03	1.9 ¡À 0.6
2	O=C(C1=CN=C(N(CC2)CCC32CCN(CC4=CN(C)C5=C4C=CC=C5)C3)N=C1)NO.[H]Cl	2.8 ¡À 0.2	2.5 ¡À 0.1	72 ¡À 7	60 ¡À 1	3.7 ¡À 0.4	4.87 ¡À 0.05	3.9 ¡À 0.1	4.1 ¡À 0.2	3.5 ¡À 0.1
3	O=C(C1=CN=C(N(CC2)CCC32CCN(CC4CCCC4)C3)N=C1)NO.[H]Cl	13.6 ¡À 0.4	12.7 ¡À 2.5	630 ¡À 7	1225 ¡À 274
4	O=C(C1=CN=C(N(CC2)CCC32CCN(CC4CCCCC4)C3)N=C1)NO.[H]Cl	10.2 ¡À 0.4	14.7 ¡À 1.4	1630 ¡À 156	1246 ¡À 70
5	O=C(C1=CN=C(N(CC2)CCC32CCN(CC4=CC=CC=C4)C3)N=C1)NO.[H]Cl	6.8 ¡À 0.5	7.6 ¡À 0.1	217 ¡À 13	375 ¡À 41
6	O=C(C1=CN=C(N(CC2)CCC32CCN(CC4=NC=CC=C4)C3)N=C1)NO.[H]Cl	16.2 ¡À 3.5	23.3 ¡À 0.8	1300 ¡À 273	1719 ¡À 289
7	O=C(C1=CN=C(N(CC2)CCC32CCN(CC4=CC=CN=C4)C3)N=C1)NO.[H]Cl	20.4 ¡À 0.1	17.9 ¡À 0.4	1833 ¡À 339	2126 ¡À 82
8	O=C(C1=CN=C(N(CC2)CCC32CCN(CC4=CC=NC=C4)C3)N=C1)NO.[H]Cl	16.9 ¡À 1.1	22.8 ¡À 0.3	3252 ¡À 347	3473 ¡À 83
9	O=C(C1=CN=C(N(CC2)CCC32CCN(CC4=COC=C4)C3)N=C1)NO.[H]Cl	35.3 ¡À 0.9	26.3 ¡À 0.8	1049 ¡À 179	1629 ¡À 229
10	O=C(C1=CN=C(N(CC2)CCC32CCN(CC4=CSC=C4)C3)N=C1)NO.[H]Cl	23.1 ¡À 2.8	11.84 ¡À 0.05	1059 ¡À 49	831 ¡À 162
11	O=C(C1=CN=C(N(CC2)CCC32CCN(CC4=CNC5=C4C=CC=C5)C3)N=C1)NO.[H]Cl	3.19 ¡À 0.07	1.9 ¡À 0.1	264 ¡À 29	241 ¡À 2	3.9 ¡À 0.1	4.5 ¡À 0.2	4.26 ¡À 0.04	2.9 ¡À 0.2	3.0 ¡À 0.1
12	O=C(C1=CN=C(N(CC2)CCC32CCN(CC4=COC5=CC=CC=C45)C3)N=C1)NO.[H]Cl	13.6 ¡À 1.4	10.9 ¡À 0.2	886 ¡À 120	576 ¡À 47
13	O=C(C1=CN=C(N(CC2)CCC32CCN(CC4=CSC5=CC=CC=C54)C3)N=C1)NO.[H]Cl	4.3 ¡À 0.3	3.6 ¡À 0.1	79 ¡À 12	109 ¡À 166
14	O=C(C1=CN=C(N(CC2)CCC32CCN(CC4=NN(C)C5=C4C=CC=C5)C3)N=C1)NO.[H]Cl	4.8 ¡À 0.3	4.9 ¡À 0.9	139 ¡À 46	395 ¡À 56
15	O=C(C1=CN=C(N(CC2)CCC32CCN(CC4=CN=C5C=CC=CN54)C3)N=C1)NO.[H]Cl	14.4 ¡À 0.3	18.5 ¡À 0.7	1958 ¡À 212	3527 ¡À 421
16	O=C(C1=CN=C(N(CC2)CCC32CCN(CC4=CN(C)C5=NC=CC=C54)C3)N=C1)NO.[H]Cl	3.0 ¡À 0.2	3.4 ¡À 0.3	281 ¡À 13	399 ¡À 127	6.4 ¡À 0.1	6.18 ¡À 0.01	6.8 ¡À 0.1	5.2 ¡À 0.3	5.0 ¡À 0.4
17	O=C(C1=CN=C(N(CC2)CCC32CCN(CC4=CN(C)C5=C4C=CN=C5)C3)N=C1)NO.[H]Cl	3.0 ¡À 0.5	5.6 ¡À 0.1	792 ¡À 127	537 ¡À 37	4.4 ¡À 0.2	4.9 ¡À 0.3	5.7 ¡À 0.3	3.9 ¡À 0.2	3.8 ¡À 0.1
18	O=C(C1=CN=C(N(CC2)CCC32CCN(CC4=CN(C)C5=C4C=NC=C5)C3)N=C1)NO.[H]Cl	4.0 ¡À 0.1	4.9 ¡À 1.2	982 ¡À 16	1462 ¡À 95	9.5 ¡À 1.4	11.7 ¡À 1.0	11.1 ¡À 1.4	8.4 ¡À 0.3	8.7 ¡À 0.8
19	O=C(C1=CN=C(N(CC2)CCC32CCN(CC4=CN(C)C5=CC=CN=C54)C3)N=C1)NO.[H]Cl	3.22 ¡À 0.02	4.3 ¡À 0.3	855 ¡À 205	755 ¡À 29	3.7 ¡À 1.0	5.0 ¡À 0.4	5.5 ¡À 0.6	3.8 ¡À 0.1	4.04 ¡À 0.03
20	O=C(C1=CN=C(N(CC2)CCC32CCN(CC4=C5C=CC=CC5=CC=C4)C3)N=C1)NO.[H]Cl	4.4 ¡À 0.5	6.7 ¡À 0.7	91 ¡À 1	154 ¡À 35
21	O=C(C1=CN=C(N(CC2)CCC32CCN(CC4=CN=CC5=C4C=CC=C5)C3)N=C1)NO.[H]Cl	11.5 ¡À 0.8	7.9 ¡À 0.6	102 ¡À 7	423 ¡À 27
22	O=C(C1=CN=C(N(CC2)CCC32CCN(CC4=CC=NC5=CC=CC=C45)C3)N=C1)NO.[H]Cl	14.6 ¡À 0.5	14.7 ¡À 1.7	482 ¡À 59	351 ¡À 107
23	O=C(C1=CN=C(N(CC2)CCC32CCN(CC4=C5C=CC=NC5=CC=C4)C3)N=C1)NO.[H]Cl	11.6 ¡À 1.0	9.2 ¡À 0.9	740 ¡À 193	559 ¡À 151
24	O=C(C1=CN=C(N(CC2)CCC32CCN(CC4=CC=CC5=C4C=NC=C5)C3)N=C1)NO.[H]Cl	8.1 ¡À 0.3	6.9 ¡À 0.1	415 ¡À 14	207 ¡À 680
25	O=C(C1=CN=C(N(CC2)CCC32CCN(CC4=C5N=CC=CC5=CC=C4)C3)N=C1)NO.[H]Cl	8.0 ¡À 0.8	3.4 ¡À 0.2	221 ¡À 8	351 ¡À 38
26	O=C(C1=CN=C(N(CC2)CCC32CCN(CC4=CC=C5C=CC=CC5=C4)C3)N=C1)NO.[H]Cl	4.1 ¡À 0.2	3.163 ¡À 0.002	228 ¡À 26	484 ¡À 83
27	O=C(C1=CN=C(N(CC2)CCC32CCN(CC4=CC5=CC=CC=C5N=C4)C3)N=C1)NO.[H]Cl	5.54 ¡À 0.04	2.7 ¡À 0.4	564 ¡À 53	145 ¡À 4
28	O=C(C1=CN=C(N(CC2)CCC32CCN(CC4=NC5=CC=CC=C5C=C4)C3)N=C1)NO.[H]Cl	6.9 ¡À 0.1	2.98 ¡À 0.03	320 ¡À 13	393¡À 702
29	O=C(C1=CN=C(N(CC2)CCC32CCN(CC4=C5C=CC=CC5=CC6=CC=CC=C46)C3)N=C1)NO.[H]Cl	22.3 ¡À 0.5	16.5 ¡À 0.8	165 ¡À 3	390 ¡À 118
30	O=C(C1=CN=C(N(CC2)CCC32CCN(CC4=CC5=CC=CC=C5C6=CC=CC=C64)C3)N=C1)NO.[H]Cl	10.1 ¡À 1.4	8.5 ¡À 0.4	204 ¡À 35	482 ¡À 113
31	O=C(C1=CN=C(N(CC2)CCC32CCN(CC4=C(C5=C67)C=CC7=CC=CC6=CC=C5C=C4)C3)N=C1)NO.[H]Cl	26.4 ¡À 0.5	19.5 ¡À 1.2	1684 ¡À 103	1968 ¡À 47
32	O=C(C1=CN=C(N(CC2)CCC32CCN(CC4=CC=C(C5=CC=CC=C5)C=C4)C3)N=C1)NO.[H]Cl	34.5 ¡À 3.2	46.1 ¡À 3.8	641 ¡À 155	732 ¡À 160
33	O=C(OC(C)(C)C)N(CC1)CC21CCNCC2
34	O=C(N1CC2(CCN(C3=NC=C(C(OCC)=O)C=N3)CC2)CC1)OC(C)(C)C
35	O=C(C1=CN=C(N(CC2)CCC32CCNC3)N=C1)OCC
36	O=C(N1CC2(CCN(C3=NC=C(C(OCC)=O)C=N3)CC2)CC1)OCC4=CC=CC=C4
37	O=C(C1=CN=C(N(CC2)CCC32CCN(C(OCC4=CC=CC=C4)=O)C3)N=C1)O
38	O=C(N1CC2(CCN(C3=NC=C(C(NOC4CCCCO4)=O)C=N3)CC2)CC1)OCC5=CC=CC=C5
39	O=C(C1=CN=C(N(CC2)CCC32CCNC3)N=C1)NOC4CCCCO4
